# Supplementary material for: An Optimized Workflow to Generate and Characterize iPSC-Derived Motor Neuron (MN) Spheroids
Source: MDPI journal article supplement (doi:10.3390/cells12040545), 2023-02-08
Supplement: s1 [file s1]

Supplementary Materials for

**An optimized workflow to generate and characterize iPSC-derived motor neuron (MN)  
spheroids**

María José Castellanos-Montiel, Mathilde Chaineau, Anna Kristyna Franco-Flores, Ghazal Haghi, Dulce Carrillo-Valenzuela, Wolfgang E. Reintsch, Carol X-Q Chen, Thomas M. Durcan

Corresponding author e-mail: [thomas.durcan@mcgill.ca](mailto:thomas.durcan@mcgill.ca) (T.M.D)

**This PDF file includes:**

Supplementary Table S1

Supplementary Figures S1–S4

**Supplementary Table S1. List of consumables and equipment**

| <b>Consumables and equipment</b>                                                | <b>Supplier</b>          | <b>Catalogue number</b>      |
|---------------------------------------------------------------------------------|--------------------------|------------------------------|
| <b>Generation of iPSC-derived MN spheroids</b>                                  |                          |                              |
| 100 mm culture dishes                                                           | Corning                  | 353003                       |
| 96 round bottom ultra-low attachment plates                                     | Corning                  | CLS7007                      |
| Cell culture incubator                                                          | Thermo Fisher Scientific | Steri-Cycle Model 370 Ref#20 |
| Cell scraper                                                                    | Corning                  | CLS3010                      |
| Centrifuge                                                                      | Eppendorf                | 022626001                    |
| Centrifuge with adapter for culture well plates                                 | Eppendorf                | 5810R                        |
| Conical tube, 15mL                                                              | Thermo Fisher Scientific | 352097                       |
| Cryovials                                                                       | Sarstedt                 | 72.379                       |
| Luna-II™ automated cell counter                                                 | Logos biosystems         | L40002                       |
| Plastic serological pipet, 10mL                                                 | Thermo Fisher Scientific | 13-678-11E                   |
| Plastic serological pipet, 1mL                                                  | Thermo Fisher Scientific | 13-678-11B                   |
| Plastic serological pipet, 5mL                                                  | Thermo Fisher Scientific | 13-678-11D                   |
| T-25 flasks                                                                     | Thermo Fisher Scientific | 12-556-009                   |
| T-75 flasks                                                                     | Thermo Fisher Scientific | 12-556-010                   |
| <b>Cell profiler macro for size profiling of MN spheroids</b>                   |                          |                              |
| EVOS XL Core                                                                    | Thermo Fisher Scientific | AMEX1000                     |
| JuLI™ Stage                                                                     | NanoEntek                | NANOJS1000S                  |
| <b>qPCR analysis of MN spheroids</b>                                            |                          |                              |
| MicroAmp™ 8 tube strip (0.2 mL)                                                 | Thermo Fisher Scientific | N8010580                     |
| MicroAmp™ optical 384-well plate reaction plate                                 | Thermo Fisher Scientific | 4309849                      |
| MicroAmp™ optical 8-cap strips                                                  | Thermo Fisher Scientific | 4323032                      |
| MicroAmp™ optical adhesive                                                      | Thermo Fisher Scientific | 4311971                      |
| Nanodrop                                                                        | Thermo Fisher Scientific | ND-ONE-W                     |
| QuantStudio 5                                                                   | Thermo Fisher Scientific | A28140                       |
| SimpliAmp™ thermal cycler                                                       | Thermo Fisher Scientific | A24811                       |
| <b>Fixation, tissue clearing and immunofluorescent staining of MN spheroids</b> |                          |                              |
| 0.6 mL locking-lid microcentrifuge tubes                                        | Thermo Fisher Scientific | 02-681-273                   |
| Benchtop shaking incubator                                                      | Corning                  | LSE™ 6790                    |
| Black bottom 96 well plate                                                      | Corning                  | 353219                       |
| Nutating mixer                                                                  | VWR                      | 82007-202                    |
| Opera Phenix High-Content Screening System                                      | PerkinElmer              | N/A                          |
| Sterile cell strainer 40 µM                                                     | Thermo Fisher Scientific | 22363547                     |
| Wide orifice low binding tips                                                   | Labcon                   | 1164-965-008-9               |
| <b>Microelectrode array (MEA) recordings of MN spheroids</b>                    |                          |                              |
| 0.2 µm filters                                                                  | Thermo Fisher Scientific | 09-719C                      |
| 30 mL Syringe                                                                   | VWR                      | 76290-386                    |
| 50 mL conical tube                                                              | Progene                  | 71-5000-B                    |
| Axion Maestro Edge                                                              | Axion Biosystems         | N/A                          |
| Cytoview 24-well MEA plates                                                     | Axion Biosystems         | M384-Tmea-24w                |
| Wide orifice low binding tips                                                   | Labcon                   | 1164-965-008-9               |

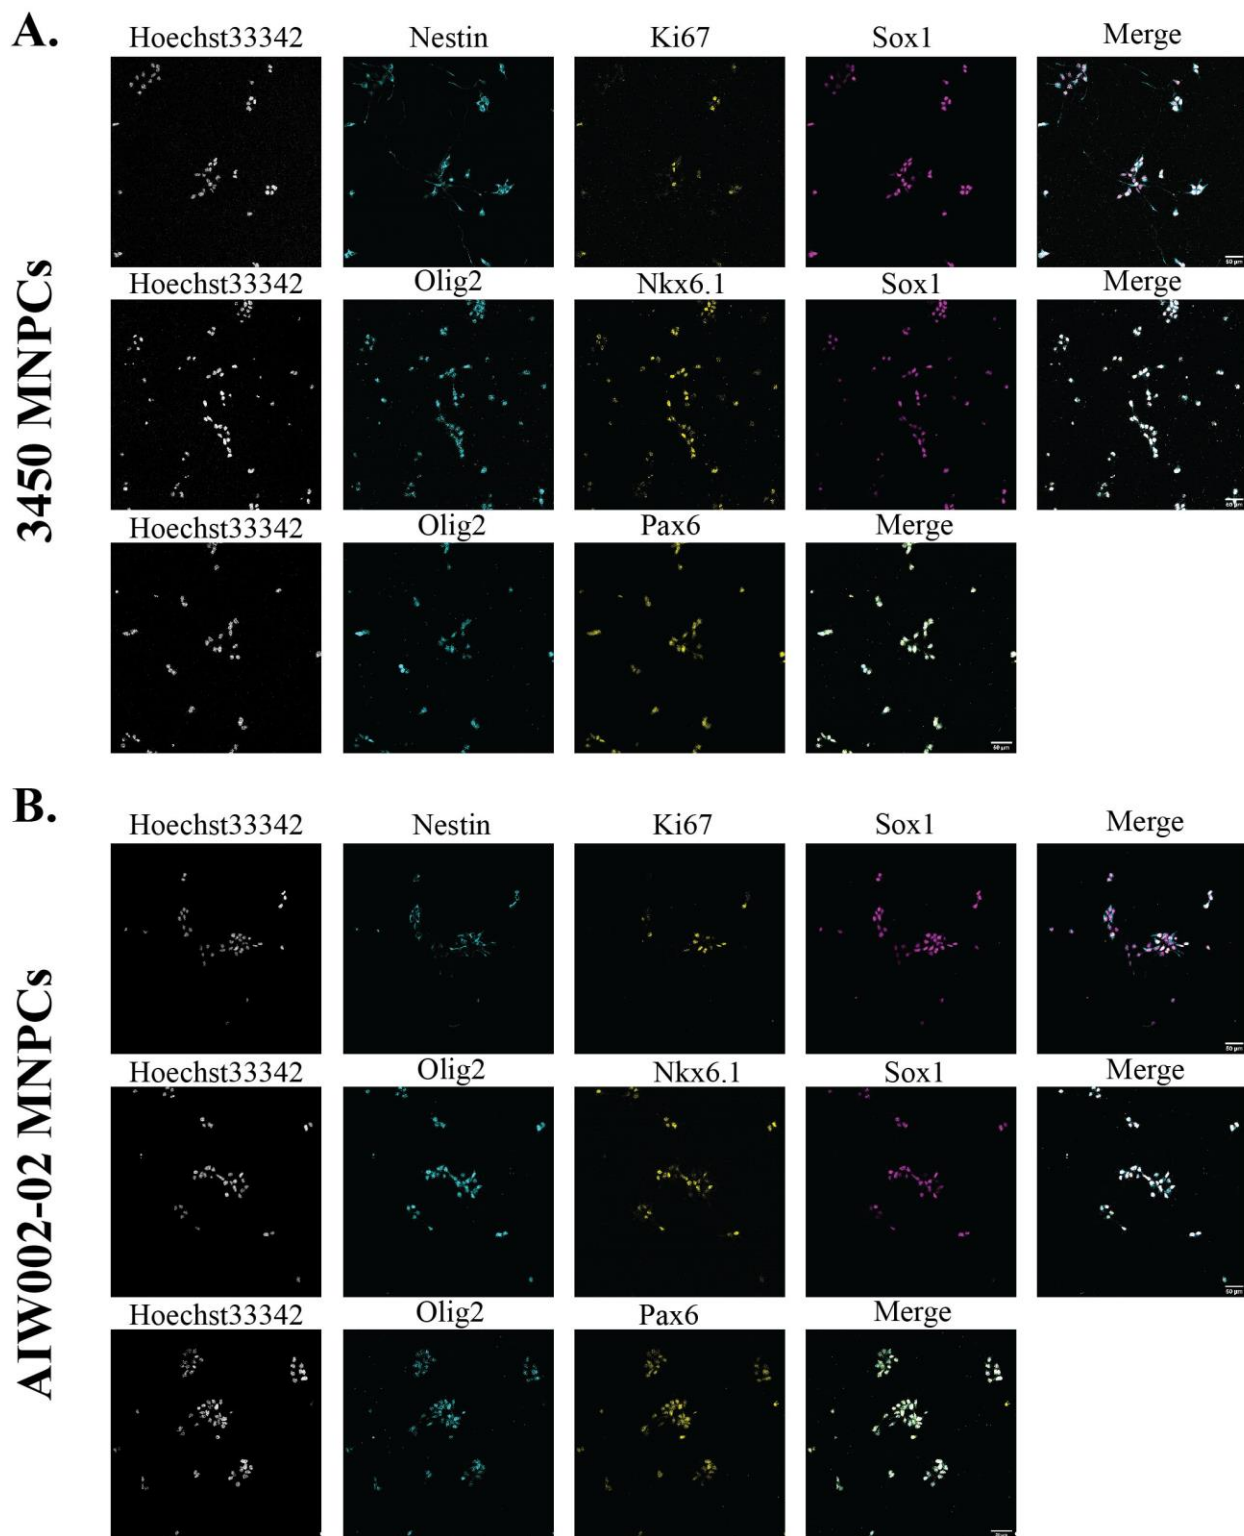

**Supplementary Figure S1. Motor neuron neural progenitor cell (MNPC) characterization by immunofluorescent staining.** A. 3450 and B. AIW002-02 MNPCs were positive for Sox1 and Nestin indicating their neural progenitor identity as well as Ki67, which demonstrates their proliferation capacity. Additionally, MNPCs are positive for the markers Pax6, Olig2 and NKx6.1 that indicate their successful specification towards motor neuron neural progenitor cells.

3450

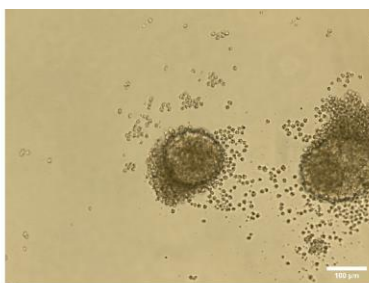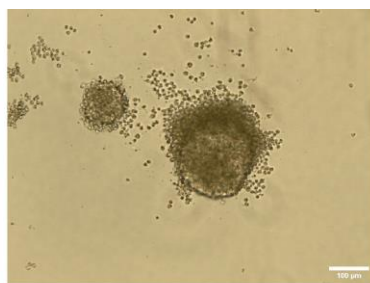

AIW002-02

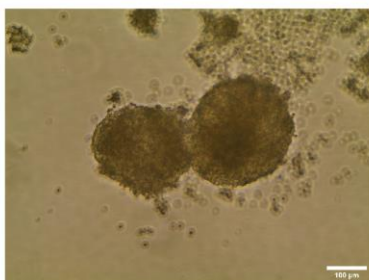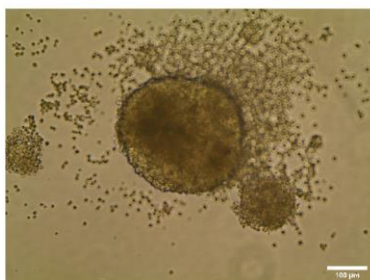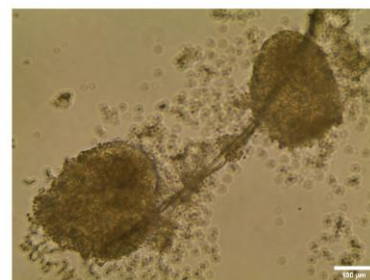

**Supplementary Figure S2. Inappropriate formation of MN spheroids.** Examples illustrating inappropriate formation of MN spheroids in random wells regardless of the iPSC line used.

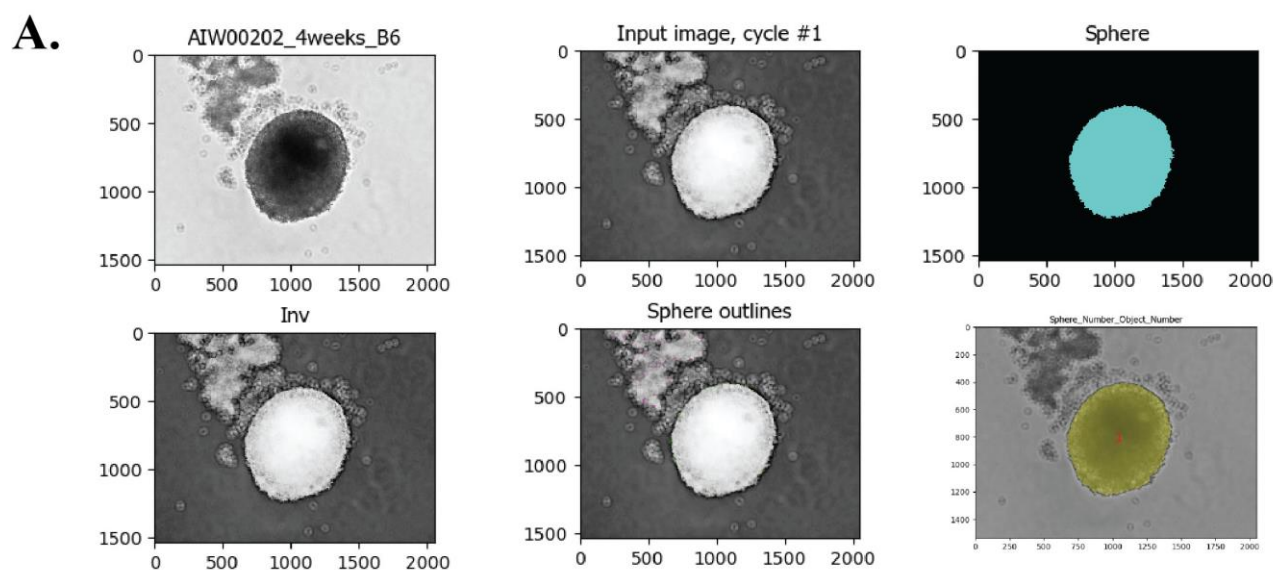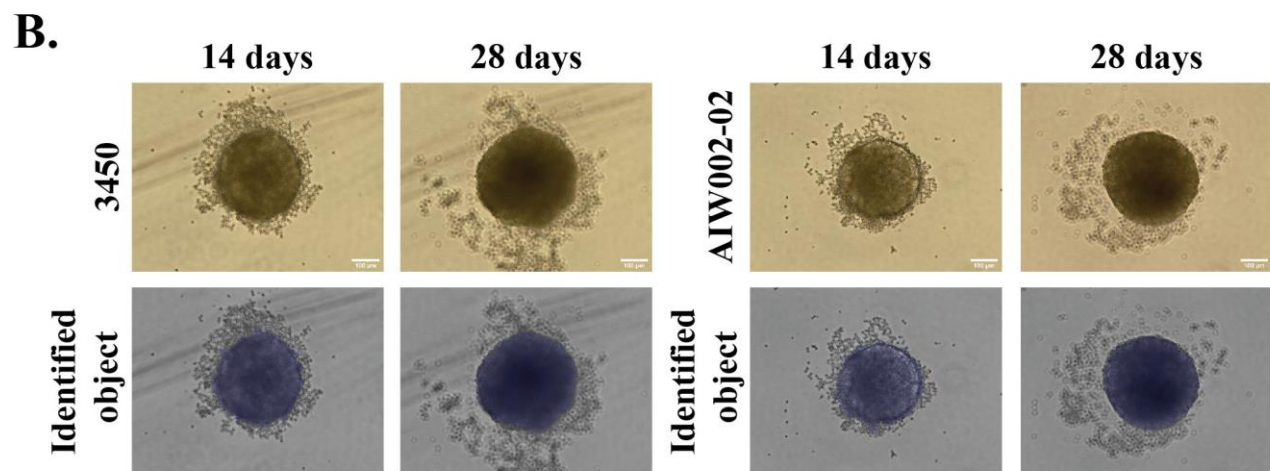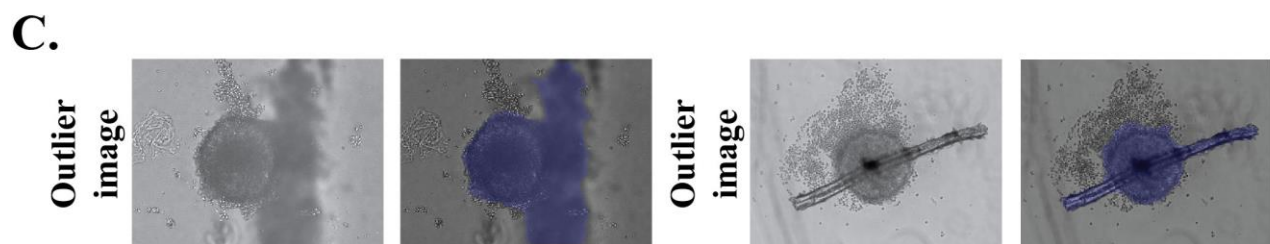

**Supplementary Figure S3. CellProfiler macro to perform the size profiling of the MN spheroids. A)** A data set of pictures taken with a bright-field microscope is inserted into a Cell Profiler pipeline. **B)** The pipeline processes the image to identify a primary object that is overlaid with the original image. **C)** Images in which the macro performed poorly are considered outliers and removed from the analyses.

**A.**

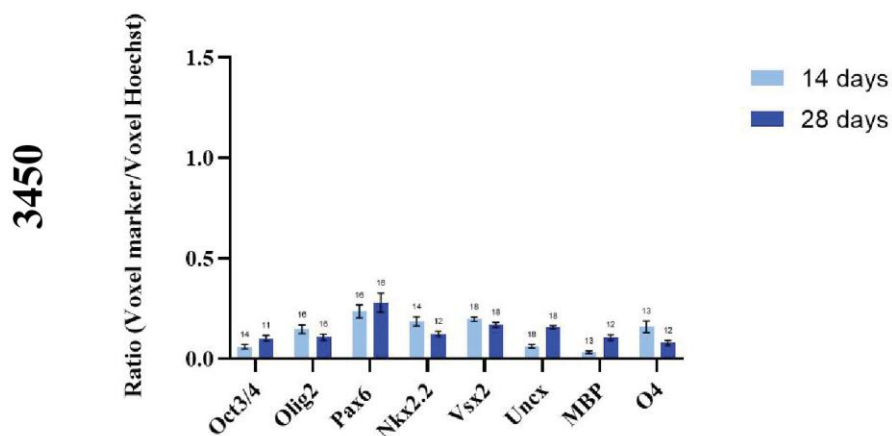

**B.**

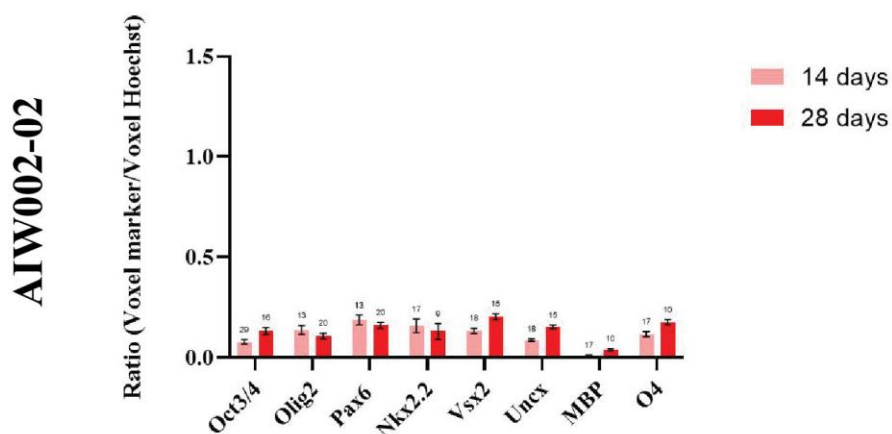

**Supplementary Figure S4. Image profiling of iPSC-derived MN spheroids to identify different cell types.** MN spheroids from **A)** 3450 and **B)** AIW002-02 control cell lines were stained for interneuron (Nkx2.2, Vsx2, Uncx) and oligodendrocyte markers (MBP, O4). The presence of these markers was quantified using an in-house MATLAB pipeline. Graph bars show the mean  $\pm$  SEM; for each cell line, each batch of three batches of iPSC-derived MNPCs generated through independent differentiation processes was used to generate two MN spheroid batches. A minimum of 9 MN spheroids were required for quantification, and we ensured that at least 3 spheroids per MNPC batch were stained for each marker per cell line at each time point.
