# Supplementary material for: An Optimized Workflow to Generate and Characterize iPSC-Derived Motor Neuron (MN) Spheroids
Source: Cells. 2023 Feb 8;12(4):545. doi: 10.3390/cells12040545 (PMC9954647; doi:10.3390/cells12040545)
Supplement: Supplementary file 1 [file cells-12-00545-s001.zip]

Archive with 8 entries (8 files):
- Castellanos-Montiel_Supplementary Material_Submission.pdf
- Castellanos-Montiel_Supplementary Table S2_Submission.xlsx
- Castellanos-Montiel_Supplementary Table S3_Submission.xlsx
- Supplementary Figure S1.jpg
- Supplementary Figure S2.jpg
- Supplementary Figure S3.jpg
- Supplementary Figure S4.jpg
- Supplementary Video S1.mp4
