# Supplementary material for: An Optimized Workflow to Generate and Characterize iPSC-Derived Motor Neuron (MN) Spheroids
Source: Cells. 2023 Feb 8;12(4):545. doi: 10.3390/cells12040545 (PMC9954647; doi:10.3390/cells12040545)
Supplement: Supplementary file 1 [file cells-12-00545-s001.zip › Castellanos-Montiel_Supplementary Table S2_Submission.xlsx]

## Sheet: Raw MEA
Supplementary Table 1. Raw MEA data
Date	Cell line	Position of electrode	Well	Spike Count					Mean Firing Rate					Burst count						Spike count	H2O	TTX
				7 days	14 days	21 days	28 days		7 days	14 days	21 days	28 days		7 days	14 days	21 days	28 days			35 days
2021-03-30	3450	22	B4	2	91	160	1890		0.00641026	0.284375	0.533333	6.3		0	0	0	59			140	188
		32	B4	0	0	33	884		0	0	0.11	2.94667		0	0	0	37			1190	1663
	AIW002-02	13	C2	0	0	428	2117		0	0	1.42667	7.05667		0	0	11	85			2631		0
		31	C2	0	2545	935	405		0	7.95312	3.11667	1.35		0	91	50	2			2227		0
		33	C2	1117	3738	1673	10		3.58013	11.6813	5.57667	0.0333333		28	128	67	0			24		0
		31	C4	33	770	154	800		0.105769	2.40625	0.513333	2.66667		0	25	2	40			408	545
2021-04-07	3450	42	B2	0	0	28	0		0	0	0.0848485	0		1	0	0	0		No basal activity at 35 days	0
	AIW002-02	33	C2	0	101	457	168		0	0.343537	1.38485	0.56		0	2	16	1			783		0
		22	C4	0	0	0	133		0	0	0	0.443333		26	0	0	0			579	927
2021-05-20	3450	11	A3	141	1500	2679	3200		0.47	5	8.93	10.6312		2	48	139	158			2744	3291
		32	A3	1	0	22	50		0.00333333	0	0.0733333	0.166113		0	0	0	0			132	136
		24	A5	332	1762	2902	2389		1.10667	5.87333	9.67333	7.93688		6	48	140	108			2018		0
		22	A6	62	53	161	10		0.206667	0.176667	0.536667	0.00333222		2	0	0	0			5		0
		13	B1	2101	1264	1258	1049		7.00333	4.21333	4.19333	0.34955		83	63	31	11			149		0
		23	B2	0	297	868	9		0	0.99	2.89333	0.0299003		0	4	6	0		No basal activity at 35 days	0
		43	B2	272	255	660	408		0.906667	0.85	2.2	1.35548		0	6	12	1		No basal activity at 35 days	0
	AIW002-02	21	C1	22	144	609	1240		0.0733333	0.48	2.03	4.1196		0	0	2	36			216	888
		31	C1	24	7	297	0		0.08	0.0233333	0.99	0		0	0	0	0			259	268
		14	C2	3	1347	1973	414		0.01	4.49	6.57667	1.37542		0	16	65	2			57	83
		23	C2	158	968	390	286		0.526667	3.22667	1.3	0.950166		6	16	0	0			18	49
		43	C2	622	23	245	23		2.07333	0.0766667	0.816667	0.076412		21	0	0	0			231	19
		13	C3	912	183	138	897		3.04	0.61	0.46	2.98007		14	1	0	35			156	855
		32	C3	1690	1176	1776	1112		5.63333	3.92	5.92	3.69435		49	19	74	35			146	11
		12	C5	97	597	917	1133		0.323333	1.99	3.05667	3.76412		2	14	1	35			1018		0
		32	C5	216	1159	899	79		0.72	3.86333	2.99667	0.262458		10	36	5	0			4		0
		33	C6	3386	1169	820	1297		11.2867	3.89667	2.73333	4.30897		74	34	5	55			614		0
		33	D2	90	119	592	208		0.3	0.396667	1.97333	0.69103		2	0	2	0			101		0
		42	D2	35	79	445	25		0.116667	0.263333	1.48333	0.0830565		2	0	0	0			144		0
