# Supplementary material for: An Optimized Workflow to Generate and Characterize iPSC-Derived Motor Neuron (MN) Spheroids
Source: Cells. 2023 Feb 8;12(4):545. doi: 10.3390/cells12040545 (PMC9954647; doi:10.3390/cells12040545)
Supplement: Supplementary file 1 [file cells-12-00545-s001.zip › Castellanos-Montiel_Supplementary Table S3_Submission.xlsx]

## Sheet: AIW002-02
Gene	NANOG		Reference sample	iPSCs				Gene	CHAT		Reference sample	MNPCs
one way-ANOVA				Post-hoc test (Dunnett)				one way-ANOVA				Post-hoc test (Dunnett)
F	p	Significance		Summary	adjusted p value	Mean Diff		F	p	Significance		Summary	adjusted p value	Mean Diff
13.28	0.0018	Yes	Comparison					71.93	<0.0001	Yes	Comparison
			iPSCs-MNPCs	**	0.0018	4.342					MNPCs-iPSCs	ns	0.9203	0.09667
			iPSCs-14 days MN spheroids	**	0.003	4.022					MNPCs-14 days MN spheroids	****	<0.0001	-1.907
			iPSCs-28 days MN spheroids	**	0.0022	4.233					MNPCs-28 days MN spheroids	****	<0.0001	-1.96
Gene	OCT4		Reference sample	iPSCs				Gene	MAP2		Reference sample	MNPCs
one way-ANOVA				Post-hoc test (Dunnett)				one way-ANOVA				Post-hoc test (Dunnett)
F	p	Significance		Summary	adjusted p value	Mean Diff		F	p	Significance		Summary	adjusted p value	Mean Diff
6.979	0.0127	Yes	Comparison					82.99	<0.0001	Yes	Comparison
			iPSCs-MNPCs	*	0.0143	3.095					MNPCs-iPSCs	ns	0.5303	0.2891
			iPSCs-14 days MN spheroids	*	0.0145	3.085					MNPCs-14 days MN spheroids	****	<0.0001	-2.586
			iPSCs-28 days MN spheroids	*	0.0146	3.083					MNPCs-28 days MN spheroids	****	<0.0001	-2.551
Gene	PAX6		Reference sample	MNPCs				Gene	VSX2		Reference sample	MNPCs
one way-ANOVA				Post-hoc test (Dunnett)				one way-ANOVA				Post-hoc test (Dunnett)
F	p	Significance		Summary	adjusted p value	Mean Diff		F	p	Significance		Summary	adjusted p value	Mean Diff
115.4	<0.0001	Yes	Comparison					31.64	<0.0001	Yes	Comparison
			MNPCs-iPSCs	****	<0.0001	3.002					MNPCs-iPSCs	ns	>0.9999	0.008213
			MNPCs-14 days MN spheroids	****	<0.0001	2.658					MNPCs-14 days MN spheroids	****	<0.0001	-5.261
			MNPCs-28 days MN spheroids	****	<0.0001	2.823					MNPCs-28 days MN spheroids	*	0.0253	-2.093
Gene	OLIG2		Reference sample	MNPCs				Gene	SIM1		Reference sample	MNPCs
one way-ANOVA				Post-hoc test (Dunnett)				one way-ANOVA				Post-hoc test (Dunnett)
F	p	Significance		Summary	adjusted p value	Mean Diff		F	p	Significance		Summary	adjusted p value	Mean Diff
4.907	0.032	Yes	Comparison					13.77	0.0016	Yes	Comparison
			MNPCs-iPSCs	*	0.0285	0.6072					MNPCs-iPSCs	ns	0.9918	-0.09656
			MNPCs-14 days MN spheroids	*	0.033	0.5884					MNPCs-14 days MN spheroids	**	0.0055	-1.927
			MNPCs-28 days MN spheroids	*	0.0459	0.5466					MNPCs-28 days MN spheroids	**	0.0033	-2.1
Gene	HB9		Reference sample	MNPCs				Gene	MBP		Reference sample	MNPCs
one way-ANOVA				Post-hoc test (Dunnett)				one way-ANOVA				Post-hoc test (Dunnett)
F	p	Significance		Summary	adjusted p value	Mean Diff		F	p	Significance		Summary	adjusted p value	Mean Diff
12.28	0.0023	Yes	Comparison					18.89	0.0005	Yes	Comparison
			MNPCs-iPSCs	ns	0.8716	0.1097					MNPCs-iPSCs	ns	0.789	-0.3532
			MNPCs-14 days MN spheroids	**	0.003	-0.8783					MNPCs-14 days MN spheroids	ns	0.1003	-1.113
			MNPCs-28 days MN spheroids	ns	0.3039	-0.292					MNPCs-28 days MN spheroids	***	0.0004	-3.171
Gene	ISL1		Reference sample	MNPCs
one way-ANOVA				Post-hoc test (Dunnett)
F	p	Significance		Summary	adjusted p value	Mean Diff
26.19	0.0002	Yes	Comparison
			MNPCs-iPSCs	ns	>0.9999	0.001588
			MNPCs-14 days MN spheroids	***	0.0004	-2.908
			MNPCs-28 days MN spheroids	**	0.0015	-2.317

## Sheet: 3450
Gene	NANOG		Reference sample	iPSCs				Gene	CHAT		Reference sample	MNPCs
one way-ANOVA				Post-hoc test (Dunnett)				one way-ANOVA				Post-hoc test (Dunnett)
F	p	Significance		Summary	adjusted p value	Mean Diff		F	p	Significance		Summary	adjusted p value	Mean Diff
119.1	<0.0001	Yes	Comparison					6.851	0.0134	Yes	Comparison
			iPSCs-MNPCs	****	<0.0001	3.961					MNPCs-iPSCs	ns	0.9711	0.2443
			iPSCs-14 days MN spheroids	****	<0.0001	3.795					MNPCs-14 days MN spheroids	ns	0.0646	-1.908
			iPSCs-28 days MN spheroids	****	<0.0001	3.893					MNPCs-28 days MN spheroids	*	0.0275	-2.316
Gene	OCT4		Reference sample	iPSCs				Gene	MAP2		Reference sample	MNPCs
one way-ANOVA				Post-hoc test (Dunnett)				one way-ANOVA				Post-hoc test (Dunnett)
F	p	Significance		Summary	adjusted p value	Mean Diff		F	p	Significance		Summary	adjusted p value	Mean Diff
196.1	<0.0001	Yes	Comparison					118	<0.0001	Yes	Comparison
			iPSCs-MNPCs	****	<0.0001	3.345					MNPCs-iPSCs	No	ns	0.3498
			iPSCs-14 days MN spheroids	****	<0.0001	3.34					MNPCs-14 days MN spheroids	Yes	****	-2.529
			iPSCs-28 days MN spheroids	****	<0.0001	3.34					MNPCs-28 days MN spheroids	Yes	****	-2.341
Gene	PAX6		Reference sample	MNPCs				Gene	VSX2		Reference sample	MNPCs
one way-ANOVA				Post-hoc test (Dunnett)				one way-ANOVA				Post-hoc test (Dunnett)
F	p	Significance		Summary	adjusted p value	Mean Diff		F	p	Significance		Summary	adjusted p value	Mean Diff
22.03	0.0003	Yes	Comparison					8.805	0.0065	Yes	Comparison
			MNPCs-iPSCs	***	0.0002	4.7					MNPCs-iPSCs	ns	>0.9999	0.0122
			MNPCs-14 days MN spheroids	**	0.001	3.65					MNPCs-14 days MN spheroids	**	0.0056	-1.334
			MNPCs-28 days MN spheroids	***	0.0007	3.859					MNPCs-28 days MN spheroids	ns	0.344	-0.464
Gene	OLIG2		Reference sample	MNPCs				Gene	SIM1		Reference sample	MNPCs
one way-ANOVA				Post-hoc test (Dunnett)				one way-ANOVA				Post-hoc test (Dunnett)
F	p	Significance		Summary	adjusted p value	Mean Diff		F	p	Significance		Summary	adjusted p value	Mean Diff
3.013	0.0943	No	Comparison					4.139	0.048	Yes	Comparison
			MNPCs-iPSCs	ns	0.0974	3.817					MNPCs-iPSCs	ns	>0.9999	0.03488
			MNPCs-14 days MN spheroids	ns	0.0893	3.91					MNPCs-14 days MN spheroids	ns	0.3502	-1.211
			MNPCs-28 days MN spheroids	ns	0.0956	3.837					MNPCs-28 days MN spheroids	*	0.0435	-2.357
Gene	HB9		Reference sample	MNPCs				Gene	MBP		Reference sample	MNPCs
one way-ANOVA				Post-hoc test (Dunnett)				one way-ANOVA				Post-hoc test (Dunnett)
F	p	Significance		Summary	adjusted p value	Mean Diff		F	p	Significance		Summary	adjusted p value	Mean Diff
7.728	0.0095	Yes	Comparison					3.625	0.0645	No	Comparison
			MNPCs-iPSCs	ns	0.4522	0.465					MNPCs-iPSCs	ns	0.9921	-0.2253
			MNPCs-14 days MN spheroids	*	0.0397	-1.067					MNPCs-14 days MN spheroids	ns	0.9522	-0.426
			MNPCs-28 days MN spheroids	ns	0.1745	-0.7143					MNPCs-28 days MN spheroids	*	0.0497	-2.95
Gene	ISL1		Reference sample	MNPCs
one way-ANOVA				Post-hoc test (Dunnett)
F	p	Significance		Summary	adjusted p value	Mean Diff
5.138	0.0286	Yes	Comparison
			MNPCs-iPSCs	ns	0.9996	0.0706
			MNPCs-14 days MN spheroids	ns	0.0686	-2.433
			MNPCs-28 days MN spheroids	ns	0.0559	-2.558
